# Supplementary material for: The Impact of Telenursing in Elderlies with Myocardial Infarction Based on a Self- care Program: A Randomized Clinical Trial
Source: Research Square preprint supplement (doi:10.21203/rs.3.rs-6029063/v1), 2025-04-10
Supplement: Supplementary file 1 [file 15223af249990c25eb06c1ac.docx]

**Additional file 2** **Cognitive test of** the Abbreviated Mental Test (AMT)

**Please provide the most appropriate answer to the following questions:**

1. How old are you?
2. What time of day is it now?
3. What year is it this year?
4. What is the name of this place?
5. What are the occupations or relationships of two of your employees or companions?
6. In what year were you born?
7. In what year did the Islamic Revolution occur?
8. What is the name of the current leader of the country?
9. Count backwards from 20, one by one.
10. Repeat the address "*Pirozi* Street, No. 42."
