# Supplementary material for: The Impact of Telenursing in Elderlies with Myocardial Infarction Based on a Self- care Program: A Randomized Clinical Trial
Source: Research Square preprint supplement (doi:10.21203/rs.3.rs-6029063/v1), 2025-04-10
Supplement: Supplementary file 2 [file 4b66940e64fe92f7c78048e9.docx]

**Informed Consent Form**

Informed consent letter for the research on “**The Impact of Telenursing in Elderlies with Myocardial Infarction based on a Self-care Program: A Randomized Clinical Trial”** as part of the master's thesis.

I, (participant's name in full) ___________________ agree to participate in the mentioned research project in 2024 that was approved by the Medical Ethics Committee of Guilan University of Medical Sciences with clinical trial code IRCT20240416061511N1 and ethical code IR.GUMS.REC.1403.032.

I understand that the text and recorded verbal or electronic communications with the researcher will be studied and may quote excerpts in a master's thesis and in future articles, journal articles, and books that the researcher may write. I understand that my responses will be anonymous and that no identifying (personal) information will be disclosed in any written or verbal context.

I understand that my participation is completely voluntary and that I may withdraw from the study without explanation at any stage if I do not wish to continue.

Name: ................................................

Address: ..........................

Signature: ................................................

Date: .........................

Signature of the researcher: .........................

Date: ..........................

**Researcher:** Arian Mobasheri**,** 09394815916, arian.mobasheri@gmail.com

Master's Student in Geriatric Nursing, Zeynab (P.B.U.H) School of Nursing and Midwifery, Guilan University of Medical Sciences, Rasht, Iran.

Please keep a copy of this information for yourself and give one copy to the researcher.
